# Supplementary material
Source: PubMed Central journal article supplement (PMC2702724)
Supplement: NIHMS45002-supplement-01.pdf [file NIHMS45002-supplement-01.pdf]

(a)

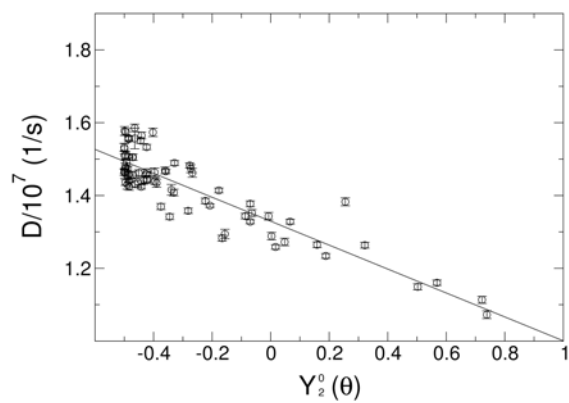

(b)

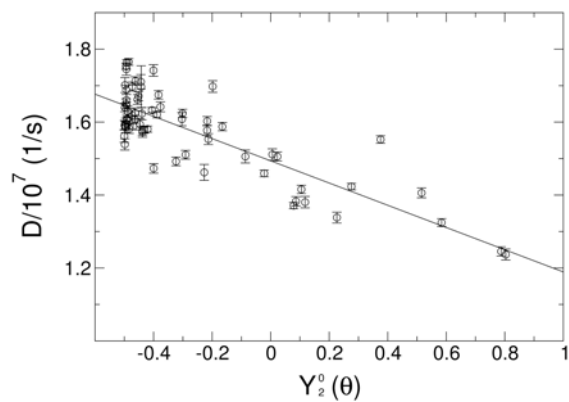

Supplementary Figure 1. The local diffusion constant  $D$  plotted as a function of the modified spherical harmonic function  $Y_2^0(\theta) = (3\cos^2\theta - 1)/2$  for the  $\text{Ca}^{2+}$ -loaded state (a) and the apo state (b).

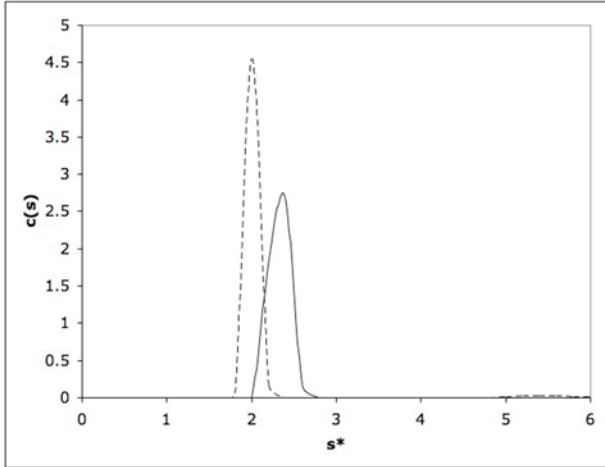

Supplementary Figure 2. Sedimentation coefficient distributions for the  $\text{Ca}^{2+}$ -bound and apo states (solid and dashed curves, respectively).

## Supplementary Table 1

Residual dipolar couplings of Ca<sup>2+</sup>-bound state of CBD1

| Residue number | RDC <sub>exp</sub> | RDC <sub>calc</sub> | * = excluded from alignment tensor calculation |
|----------------|--------------------|---------------------|------------------------------------------------|
| 374            | 14.5300            | 12.2538             |                                                |
| 376            | 12.3100            | 12.9651             |                                                |
| 377            | 10.3800            | 8.6017              |                                                |
| 378            | 15.1400            | 12.0369             |                                                |
| 379            | 14.0100            | 14.3500             |                                                |
| 381            | 14.2500            | 17.1610             |                                                |
| 382            | 8.8400             | 2.5091              |                                                |
| 383            | 7.7300             | -1.0753             | *                                              |
| 384            | 4.5000             | 9.3364              |                                                |
| 385            | -3.1600            | -12.7485            | *                                              |
| 387            | 12.6000            | 12.5166             |                                                |
| 388            | -6.8400            | -12.2619            |                                                |
| 389            | 20.8200            | 17.5183             |                                                |
| 391            | 2.8700             | 1.9861              |                                                |
| 392            | 8.5600             | 11.4870             |                                                |
| 393            | 3.0700             | 3.7944              |                                                |
| 394            | 6.1200             | 10.3184             |                                                |
| 395            | 9.3600             | 9.6963              |                                                |
| 396            | 17.0800            | 15.5061             |                                                |
| 397            | 15.8500            | 16.5524             |                                                |
| 399            | 9.4300             | 10.8409             |                                                |
| 402            | -1.9800            | -4.1905             |                                                |
| 403            | 5.5400             | 10.8448             |                                                |
| 404            | -7.7400            | -10.1829            |                                                |
| 405            | 6.1500             | 7.2970              |                                                |
| 406            | -2.8100            | -8.5547             | *                                              |
| 407            | 8.1200             | 7.4871              |                                                |
| 408            | 6.7200             | 0.8896              | *                                              |
| 409            | 12.2300            | 10.6986             |                                                |
| 411            | 12.3200            | 10.8407             |                                                |
| 412            | 15.6500            | 15.6950             |                                                |
| 413            | 15.8400            | 14.8533             |                                                |

|     |          |          |
|-----|----------|----------|
| 414 | 2.0100   | 3.9757   |
| 415 | 13.5500  | 12.8324  |
| 416 | -17.2500 | -16.7920 |
| 417 | -19.0300 | -17.5956 |
| 418 | 1.0600   | 3.0736   |
| 419 | 9.3700   | 12.6253  |
| 420 | -2.2200  | -1.6789  |
| 421 | 2.5200   | -1.8993  |
| 422 | 19.0900  | 17.6822  |
| 423 | 17.3300  | 14.6332  |
| 424 | -3.2500  | -5.2712  |
| 425 | 11.8100  | 10.2714  |
| 426 | 11.9300  | 9.4816   |
| 427 | 11.5700  | 9.6603   |
| 429 | 11.1700  | 11.4036  |
| 430 | -1.1500  | -1.3851  |
| 431 | 7.8400   | 13.7856  |
| 432 | -11.9800 | -17.1148 |
| 435 | 6.5800   | 5.5132   |
| 437 | 9.6300   | 1.8224   |
| 438 | 10.0500  | 8.2749   |
| 439 | 6.8800   | 5.5877   |
| 440 | 6.0500   | 6.4996   |
| 441 | 2.1400   | 3.1596   |
| 442 | 9.7800   | 11.5967  |
| 443 | -0.2200  | 1.8344   |
| 444 | 15.5800  | 15.4419  |
| 445 | 11.6200  | 8.8501   |
| 446 | 6.2200   | 4.5498   |
| 447 | 12.0800  | 10.8214  |
| 448 | 18.2100  | 17.1390  |
| 449 | -27.7400 | -25.8975 |
| 450 | -23.9300 | -20.5249 |
| 451 | 17.4100  | 17.9195  |
| 452 | 15.0200  | 17.8318  |
| 453 | 3.3800   | 2.8566   |
| 454 | 12.9700  | 12.6706  |
| 455 | 12.3600  | 13.7958  |
| 456 | 15.6100  | 16.2144  |
| 457 | 16.8100  | 15.0909  |
| 458 | 14.5100  | 12.1979  |
| 459 | 9.6400   | 9.5928   |
| 460 | 12.1700  | 10.1736  |
| 462 | 12.7600  | 11.7565  |

\*

|     |         |         |   |
|-----|---------|---------|---|
| 463 | 10.6500 | 9.7690  |   |
| 464 | 1.3800  | -0.4525 |   |
| 465 | 9.4400  | 6.9469  |   |
| 466 | 6.2000  | 13.2348 | * |
| 483 | 9.7500  | 5.2295  | * |
| 484 | 16.3400 | 15.2782 |   |
| 486 | 1.8800  | 12.6271 | * |
| 487 | 5.3200  | 8.6159  |   |
| 488 | 5.8300  | 4.5769  |   |
| 491 | -2.3200 | 11.2033 | * |
| 492 | 13.8900 | 11.4472 |   |
| 493 | 13.6600 | 14.4600 |   |
| 494 | 17.8900 | 15.8748 |   |
| 496 | 15.9600 | 14.6205 |   |
| 497 | -0.2600 | -2.4164 |   |
| 498 | 8.5200  | 10.6147 |   |
| 500 | 3.7700  | 5.3605  |   |
| 501 | 0.2200  | 9.1342  | * |
| 502 | 2.9900  | 9.0488  | * |

## Supplementary Table 2

Residual dipolar couplings of apo state of CBD1

| Residue number | RDC <sub>exp</sub> | RDC <sub>calc</sub> | * = excluded from alignment tensor calculation |
|----------------|--------------------|---------------------|------------------------------------------------|
| 374            | 14.4200            | 10.8218             |                                                |
| 376            | 19.8700            | 18.5840             |                                                |
| 377            | 13.7900            | 11.9350             |                                                |
| 378            | 13.0600            | 11.2819             |                                                |
| 379            | 11.7600            | 8.3939              |                                                |
| 380            | 15.0900            | 14.9404             |                                                |
| 383            | 13.2500            | 3.7784              | *                                              |
| 386            | 9.7700             | 2.5865              | *                                              |
| 387            | 19.1900            | 18.2645             |                                                |
| 388            | -3.7300            | -7.3918             |                                                |
| 389            | 13.7000            | 14.4769             |                                                |
| 391            | -6.3900            | -8.5701             |                                                |
| 392            | 3.2200             | 6.8340              |                                                |

|     |          |          |   |
|-----|----------|----------|---|
| 393 | 1.4000   | 2.2135   |   |
| 395 | 15.8100  | 15.8462  |   |
| 397 | 19.0800  | 19.0204  |   |
| 399 | 12.3700  | 11.6737  |   |
| 402 | 3.4200   | 0.0281   |   |
| 403 | 3.9600   | 10.6811  |   |
| 405 | 4.5100   | 3.2596   |   |
| 406 | -3.1000  | -11.8109 | * |
| 407 | 12.6800  | 10.8633  |   |
| 408 | 12.0100  | 2.3581   | * |
| 412 | 9.8900   | 8.9276   |   |
| 413 | 7.8300   | 7.4956   |   |
| 414 | 3.3300   | 6.0192   |   |
| 416 | -11.7700 | -12.3699 |   |
| 417 | -20.8900 | -21.2509 |   |
| 418 | 2.6400   | 4.0522   |   |
| 419 | 14.0300  | 15.8259  |   |
| 420 | -0.7300  | 2.1518   |   |
| 421 | 1.7500   | -7.8711  | * |
| 422 | 18.1000  | 17.0725  |   |
| 423 | 16.9600  | 15.9336  |   |
| 424 | 1.3800   | -0.3767  |   |
| 425 | 16.9400  | 13.9744  |   |
| 427 | 16.4400  | 14.6723  |   |
| 429 | 16.8800  | 16.8033  |   |
| 430 | 0.7500   | -2.8022  |   |
| 431 | 7.3900   | 16.8732  | * |
| 432 | -18.0400 | -20.5685 |   |
| 437 | 11.2100  | 2.3720   | * |
| 438 | 15.7100  | 12.6143  |   |
| 439 | 9.9200   | 9.6703   |   |
| 441 | -4.3800  | -6.5959  |   |
| 442 | 4.0400   | 2.6067   |   |
| 443 | -9.4500  | -8.9018  |   |
| 444 | 21.3600  | 19.1135  |   |
| 445 | 18.5500  | 12.2134  | * |
| 446 | 8.7700   | 6.6960   |   |
| 447 | 6.2000   | 11.8173  |   |
| 449 | -10.3500 | -30.4495 | * |
| 450 | -10.7700 | -16.2959 |   |
| 451 | -13.2600 | 15.8645  | * |
| 452 | -2.9500  | 14.6385  | * |
| 456 | 16.5100  | 18.3535  |   |
| 457 | 15.6400  | 13.8859  |   |

|     |         |         |   |
|-----|---------|---------|---|
| 458 | 12.8900 | 11.3360 |   |
| 459 | 14.8900 | 10.8519 | * |
| 460 | 12.3300 | 7.2442  |   |
| 462 | 19.5600 | 17.3834 |   |
| 463 | 16.1600 | 14.3674 |   |
| 464 | 0.5600  | -0.9967 |   |
| 465 | 6.6400  | 5.3581  |   |
| 466 | 0.5200  | 5.9554  |   |
| 483 | 8.4700  | 8.2258  |   |
| 484 | 12.0100 | 9.1817  |   |
| 486 | 14.2000 | 7.8525  | * |
| 487 | 10.5400 | 13.5054 |   |
| 488 | 8.4700  | 8.4463  |   |
| 490 | 15.6800 | 16.9016 |   |
| 492 | 11.4200 | 7.9277  |   |
| 493 | 15.1800 | 13.2421 |   |
| 494 | 16.4200 | 17.2107 |   |
| 496 | 17.5000 | 19.2918 |   |
| 497 | 3.9900  | 3.7752  |   |
| 502 | -0.5800 | 11.4015 | * |

### Supplementary Table 3

<sup>15</sup>N backbone relaxation of Ca<sup>2+</sup>-bound CBD1

| Residue number | T <sub>1</sub> (s) | T <sub>2</sub> (s) | NOE           |
|----------------|--------------------|--------------------|---------------|
| 373            | 1.2186±0.0099      | 0.0528±0.0005      | 0.8017±0.0194 |
| 374            | 1.2989±0.0123      | 0.0572±0.0006      | 0.8307±0.0221 |
| 376            | 1.2279±0.0103      | 0.0503±0.0005      | 0.8708±0.0186 |
| 377            | 1.1537±0.0098      | 0.0576±0.0006      | 0.8212±0.0190 |
| 378            | 1.1730±0.0056      | 0.0540±0.0002      | 0.8241±0.0110 |
| 379            | 1.2157±0.0111      | 0.0616±0.0005      | 0.8224±0.0162 |
| 381            | 1.2207±0.0077      | 0.0609±0.0004      | 0.8357±0.0150 |
| 382            | 1.3738±0.0079      | 0.0565±0.0003      | 0.7860±0.0136 |
| 383            | 1.2297±0.0059      | 0.0528±0.0003      | 0.8375±0.0116 |
| 384            | 1.4094±0.0101      | 0.0518±0.0004      | 0.8385±0.0162 |
| 385            | 1.3362±0.0105      | 0.0531±0.0005      | 0.8263±0.0165 |
| 387            | 1.1888±0.0066      | 0.0516±0.0003      | 0.8473±0.0119 |
| 388            | 1.3742±0.0100      | 0.0447±0.0004      | 0.8611±0.0151 |
| 389            | 1.3034±0.0054      | 0.0550±0.0002      | 0.8337±0.0098 |

|     |               |               |               |
|-----|---------------|---------------|---------------|
| 391 | 1.4539±0.0089 | 0.0473±0.0003 | 0.8364±0.0152 |
| 392 | 1.3046±0.0090 | 0.0568±0.0004 | 0.8124±0.0162 |
| 393 | 1.4474±0.0096 | 0.0548±0.0004 | 0.8099±0.0151 |
| 394 | 1.2101±0.0100 | 0.0532±0.0004 | 0.8684±0.0174 |
| 395 | 1.2118±0.0098 | 0.0524±0.0004 | 0.8499±0.0182 |
| 396 | 1.2724±0.0097 | 0.0538±0.0004 | 0.8303±0.0178 |
| 397 | 1.1380±0.0079 | 0.0540±0.0004 | 0.8262±0.0167 |
| 399 | 1.1827±0.0207 | 0.0339±0.0006 | 0.8093±0.0291 |
| 402 | 1.2151±0.0146 | 0.0445±0.0006 | 0.8402±0.0231 |
| 403 | 1.1011±0.0121 | 0.0540±0.0007 | 0.7904±0.0241 |
| 404 | 1.5480±0.0122 | 0.0428±0.0004 | 0.7846±0.0177 |
| 405 | 1.3161±0.0097 | 0.0506±0.0004 | 0.8556±0.0167 |
| 406 | 1.4941±0.0121 | 0.0462±0.0004 | 0.8125±0.0193 |
| 407 | 1.2716±0.0091 | 0.0497±0.0004 | 0.8352±0.0182 |
| 408 | 1.2715±0.0095 | 0.0487±0.0004 | 0.8800±0.0189 |
| 409 | 1.2015±0.0078 | 0.0501±0.0004 | 0.8470±0.0146 |
| 411 | 1.1969±0.0092 | 0.0502±0.0004 | 0.8011±0.0160 |
| 412 | 1.2249±0.0069 | 0.0583±0.0004 | 0.8190±0.0126 |
| 413 | 1.3063±0.0096 | 0.0496±0.0004 | 0.8863±0.0158 |
| 414 | 1.4418±0.0133 | 0.0538±0.0005 | 0.8322±0.0174 |
| 415 | 1.2950±0.0121 | 0.0560±0.0006 | 0.8511±0.0189 |
| 416 | 1.4689±0.0114 | 0.0406±0.0004 | 0.8593±0.0155 |
| 417 | 1.8064±0.0209 | 0.0430±0.0006 | 0.8422±0.0212 |
| 418 | 1.3191±0.0129 | 0.0484±0.0005 | 0.8502±0.0181 |
| 419 | 1.3091±0.0106 | 0.0547±0.0005 | 0.8611±0.0172 |
| 420 | 1.3477±0.0089 | 0.0500±0.0003 | 0.7216±0.0128 |
| 421 | 1.3172±0.0132 | 0.0510±0.0006 | 0.8582±0.0196 |
| 422 | 1.1574±0.0056 | 0.0510±0.0003 | 0.8510±0.0109 |
| 423 | 1.1423±0.0084 | 0.0562±0.0004 | 0.8412±0.0159 |
| 424 | 1.4263±0.0112 | 0.0468±0.0004 | 0.8416±0.0171 |
| 425 | 1.2038±0.0093 | 0.0519±0.0004 | 0.8616±0.0174 |
| 426 | 1.2997±0.0068 | 0.0537±0.0003 | 0.8246±0.0133 |
| 427 | 1.2234±0.0060 | 0.0528±0.0002 | 0.8278±0.0124 |
| 429 | 1.2070±0.0083 | 0.0553±0.0004 | 0.8323±0.0155 |
| 430 | 1.5330±0.0092 | 0.0483±0.0004 | 0.8093±0.0166 |
| 431 | 1.2995±0.0101 | 0.0552±0.0004 | 0.8121±0.0163 |
| 432 | 1.7525±0.0178 | 0.0447±0.0006 | 0.8647±0.0240 |
| 435 | 1.3208±0.0087 | 0.0489±0.0004 | 0.8161±0.0142 |
| 437 | 1.2155±0.0077 | 0.0515±0.0004 | 0.8233±0.0135 |
| 438 | 1.2340±0.0065 | 0.0598±0.0004 | 0.8286±0.0142 |
| 439 | 1.3492±0.0066 | 0.0592±0.0003 | 0.8004±0.0120 |
| 440 | 1.2337±0.0070 | 0.0556±0.0004 | 0.8121±0.0142 |



|     |               |               |               |
|-----|---------------|---------------|---------------|
| 441 | 1.4819±0.0079 | 0.0536±0.0003 | 0.8252±0.0141 |
| 442 | 1.3208±0.0075 | 0.0589±0.0004 | 0.8269±0.0137 |
| 443 | 1.4144±0.0128 | 0.0469±0.0005 | 0.8403±0.0194 |
| 444 | 1.2229±0.0087 | 0.0548±0.0004 | 0.8391±0.0158 |
| 445 | 1.2067±0.0127 | 0.0524±0.0005 | 0.8294±0.0186 |
| 446 | 1.2596±0.0092 | 0.0507±0.0004 | 0.8404±0.0157 |
| 447 | 1.4459±0.0067 | 0.0626±0.0003 | 0.7270±0.0101 |
| 448 | 1.2182±0.0148 | 0.0575±0.0007 | 0.8273±0.0194 |
| 449 | 1.7550±0.0114 | 0.0396±0.0004 | 0.8391±0.0149 |
| 450 | 1.5618±0.0200 | 0.0400±0.0005 | 0.8726±0.0208 |
| 451 | 1.1969±0.0136 | 0.0525±0.0006 | 0.8564±0.0218 |
| 452 | 1.2519±0.0072 | 0.0615±0.0003 | 0.7987±0.0129 |
| 453 | 1.3795±0.0067 | 0.0535±0.0003 | 0.7919±0.0107 |
| 454 | 1.2500±0.0109 | 0.0590±0.0006 | 0.7296±0.0150 |
| 455 | 1.3050±0.0128 | 0.0548±0.0005 | 0.8558±0.0183 |
| 456 | 1.1795±0.0075 | 0.0517±0.0003 | 0.8474±0.0140 |
| 457 | 1.2060±0.0105 | 0.0519±0.0005 | 0.8250±0.0166 |
| 458 | 1.2863±0.0076 | 0.0554±0.0003 | 0.8452±0.0139 |
| 459 | 1.2737±0.0107 | 0.0530±0.0006 | 0.8489±0.0193 |
| 460 | 1.2692±0.0134 | 0.0537±0.0006 | 0.7928±0.0214 |
| 462 | 1.1744±0.0108 | 0.0589±0.0006 | 0.8172±0.0183 |
| 463 | 1.1913±0.0057 | 0.0583±0.0003 | 0.8257±0.0141 |
| 464 | 1.4071±0.0184 | 0.0412±0.0006 | 0.8548±0.0318 |
| 465 | 1.3063±0.0111 | 0.0468±0.0005 | 0.7709±0.0254 |
| 466 | 1.1875±0.0099 | 0.0497±0.0005 | 0.7637±0.0215 |
| 469 | 0.8818±0.0046 | 0.1105±0.0006 | 0.4530±0.0097 |
| 470 | 0.9278±0.0064 | 0.1361±0.0010 | 0.3455±0.0109 |
| 472 | 0.8504±0.0035 | 0.1233±0.0005 | 0.4218±0.0080 |
| 473 | 0.8534±0.0039 | 0.1339±0.0007 | 0.3724±0.0089 |
| 475 | 0.8151±0.0025 | 0.1028±0.0003 | 0.4492±0.0076 |
| 476 | 0.8753±0.0030 | 0.1085±0.0004 | 0.4180±0.0080 |
| 477 | 0.9313±0.0056 | 0.0993±0.0006 | 0.4788±0.0123 |
| 480 | 1.0535±0.0093 | 0.0693±0.0006 | 0.6211±0.0172 |
| 483 | 1.0570±0.0144 | 0.0490±0.0008 | 0.7420±0.0319 |
| 484 | 1.1818±0.0077 | 0.0521±0.0004 | 0.7957±0.0202 |
| 486 | 1.2804±0.0130 | 0.0534±0.0007 | 0.8445±0.0255 |
| 487 | 1.2985±0.0159 | 0.0530±0.0008 | 0.8292±0.0270 |
| 488 | 1.6279±0.0199 | 0.0565±0.0007 | 0.7886±0.0222 |
| 490 | 1.1966±0.0288 | 0.0584±0.0014 | 0.8281±0.0312 |
| 492 | 1.2089±0.0092 | 0.0541±0.0004 | 0.8434±0.0162 |
| 493 | 1.3254±0.0095 | 0.0552±0.0004 | 0.8263±0.0160 |
| 494 | 1.1766±0.0087 | 0.0541±0.0004 | 0.8179±0.0151 |

|     |               |               |                |
|-----|---------------|---------------|----------------|
| 496 | 1.2280±0.0104 | 0.0564±0.0005 | 0.8469±0.0166  |
| 497 | 1.3576±0.0125 | 0.0462±0.0005 | 0.8324±0.0175  |
| 498 | 1.2096±0.0145 | 0.0523±0.0007 | 0.8333±0.0210  |
| 500 | 1.4140±0.0104 | 0.0477±0.0004 | 0.8381±0.0152  |
| 501 | 0.9909±0.0049 | 0.0738±0.0003 | 0.6468±0.0093  |
| 502 | 0.9375±0.0102 | 0.1029±0.0011 | 0.5573±0.0149  |
| 503 | 0.9288±0.0089 | 0.1633±0.0017 | 0.3512±0.0118  |
| 504 | 0.8847±0.0016 | 0.1536±0.0003 | 0.4689±0.0037  |
| 505 | 0.7926±0.0020 | 0.1953±0.0006 | 0.2433±0.0045  |
| 506 | 0.8314±0.0041 | 0.2629±0.0018 | 0.0808±0.0070  |
| 507 | 0.8334±0.0024 | 0.2997±0.0014 | 0.0149±0.0047  |
| 508 | 0.8640±0.0016 | 0.3723±0.0014 | -0.0920±0.0037 |

#### Supplementary Table 4

<sup>15</sup>N backbone relaxation of apo state of CBD1

| Residue number | T <sub>1</sub> (s) | T <sub>2</sub> (s) | NOE           |
|----------------|--------------------|--------------------|---------------|
| 374            | 1.2234±0.0138      | 0.0698±0.0009      | 0.8779±0.0359 |
| 376            | 1.1658±0.0122      | 0.0590±0.0007      | 0.8219±0.0281 |
| 377            | 1.0917±0.0111      | 0.0665±0.0008      | 0.7834±0.0287 |
| 378            | 1.1308±0.0069      | 0.0611±0.0004      | 0.8432±0.0200 |
| 379            | 1.1916±0.0156      | 0.0692±0.0010      | 0.8434±0.0307 |
| 380            | 1.1404±0.0068      | 0.0580±0.0004      | 0.8179±0.0194 |
| 383            | 1.1356±0.0098      | 0.0550±0.0007      | 0.8498±0.0305 |
| 384            | 1.2527±0.0119      | 0.0557±0.0006      | 0.7886±0.0307 |
| 385            | 1.2430±0.0093      | 0.0610±0.0005      | 0.7868±0.0246 |
| 387            | 1.0769±0.0085      | 0.0576±0.0006      | 0.8567±0.0252 |
| 388            | 1.1602±0.0127      | 0.0479±0.0007      | 0.8491±0.0306 |
| 389            | 1.2335±0.0070      | 0.0618±0.0004      | 0.8414±0.0193 |
| 391            | 1.3755±0.0108      | 0.0527±0.0005      | 0.8389±0.0267 |
| 392            | 1.2706±0.0115      | 0.0641±0.0007      | 0.7972±0.0286 |
| 393            | 1.3569±0.0114      | 0.0627±0.0006      | 0.8206±0.0260 |
| 394            | 1.1461±0.0120      | 0.0620±0.0007      | 0.8800±0.0317 |
| 395            | 1.1400±0.0116      | 0.0625±0.0007      | 0.8678±0.0302 |
| 396            | 1.2006±0.0121      | 0.0649±0.0007      | 0.8254±0.0288 |
| 397            | 1.0874±0.0093      | 0.0623±0.0006      | 0.8013±0.0245 |
| 399            | 1.1639±0.0245      | 0.0382±0.0009      | 0.8079±0.0425 |
| 400            | 1.1208±0.0109      | 0.0579±0.0007      | 0.7967±0.0288 |
| 403            | 1.0595±0.0145      | 0.0616±0.0010      | 0.7963±0.0356 |

|     |               |               |               |
|-----|---------------|---------------|---------------|
| 404 | 1.4053±0.0124 | 0.0508±0.0005 | 0.7997±0.0251 |
| 405 | 1.2618±0.0118 | 0.0584±0.0006 | 0.7927±0.0259 |
| 406 | 1.3797±0.0143 | 0.0535±0.0006 | 0.9245±0.0326 |
| 407 | 1.2041±0.0096 | 0.0608±0.0006 | 0.8464±0.0270 |
| 408 | 1.1898±0.0105 | 0.0555±0.0005 | 0.8298±0.0260 |
| 409 | 1.1412±0.0096 | 0.0578±0.0006 | 0.8482±0.0245 |
| 411 | 1.1348±0.0100 | 0.0589±0.0006 | 0.8328±0.0258 |
| 412 | 1.1773±0.0094 | 0.0663±0.0006 | 0.8103±0.0229 |
| 413 | 1.2475±0.0107 | 0.0563±0.0006 | 0.8229±0.0249 |
| 414 | 1.3412±0.0155 | 0.0622±0.0008 | 0.8126±0.0322 |
| 415 | 1.2016±0.0123 | 0.0603±0.0007 | 0.7952±0.0265 |
| 416 | 1.2877±0.0136 | 0.0514±0.0007 | 0.8688±0.0322 |
| 417 | 1.6119±0.0210 | 0.0506±0.0009 | 0.8399±0.0379 |
| 418 | 1.2314±0.0173 | 0.0482±0.0008 | 0.8208±0.0358 |
| 419 | 1.1597±0.0125 | 0.0613±0.0008 | 0.8301±0.0321 |
| 420 | 1.3581±0.0109 | 0.0565±0.0006 | 0.7466±0.0239 |
| 421 | 1.2558±0.0121 | 0.0582±0.0007 | 0.8157±0.0278 |
| 422 | 1.1137±0.0078 | 0.0573±0.0005 | 0.8900±0.0249 |
| 423 | 1.1023±0.0094 | 0.0630±0.0006 | 0.8490±0.0262 |
| 424 | 1.2999±0.0144 | 0.0504±0.0007 | 0.8505±0.0341 |
| 425 | 1.1364±0.0115 | 0.0549±0.0007 | 0.7822±0.0299 |
| 426 | 1.2188±0.0080 | 0.0609±0.0005 | 0.8458±0.0217 |
| 427 | 1.1434±0.0067 | 0.0608±0.0004 | 0.8502±0.0186 |
| 429 | 1.1551±0.0104 | 0.0642±0.0006 | 0.8436±0.0266 |
| 430 | 1.3918±0.0099 | 0.0575±0.0005 | 0.8154±0.0233 |
| 431 | 1.2382±0.0120 | 0.0644±0.0007 | 0.8672±0.0282 |
| 432 | 1.5977±0.0184 | 0.0510±0.0007 | 0.8284±0.0317 |
| 437 | 1.1261±0.0084 | 0.0597±0.0005 | 0.8290±0.0203 |
| 438 | 1.1707±0.0088 | 0.0687±0.0006 | 0.8098±0.0239 |
| 439 | 1.2840±0.0076 | 0.0683±0.0004 | 0.7913±0.0184 |
| 441 | 1.3881±0.0098 | 0.0609±0.0005 | 0.7681±0.0238 |
| 442 | 1.2824±0.0109 | 0.0661±0.0006 | 0.8306±0.0276 |
| 443 | 1.3567±0.0160 | 0.0523±0.0008 | 0.8894±0.0354 |
| 444 | 1.1392±0.0122 | 0.0594±0.0007 | 0.8913±0.0352 |
| 445 | 1.1530±0.0146 | 0.0518±0.0007 | 0.8193±0.0385 |
| 446 | 1.1406±0.0120 | 0.0525±0.0006 | 0.7770±0.0320 |
| 447 | 1.1071±0.0063 | 0.0725±0.0005 | 0.5937±0.0169 |
| 448 | 1.0864±0.0050 | 0.0702±0.0004 | 0.6411±0.0149 |
| 449 | 1.1095±0.0047 | 0.0763±0.0004 | 0.5874±0.0156 |
| 450 | 1.0135±0.0066 | 0.0602±0.0004 | 0.7009±0.0228 |
| 451 | 1.1371±0.0111 | 0.0541±0.0006 | 0.6736±0.0320 |
| 452 | 1.0722±0.0052 | 0.0862±0.0005 | 0.4928±0.0175 |

|     |               |               |                |
|-----|---------------|---------------|----------------|
| 456 | 1.1352±0.0104 | 0.0573±0.0007 | 0.8682±0.0303  |
| 457 | 1.1380±0.0133 | 0.0601±0.0008 | 0.8887±0.0340  |
| 458 | 1.2274±0.0098 | 0.0637±0.0006 | 0.8116±0.0220  |
| 459 | 1.2158±0.0127 | 0.0596±0.0007 | 0.8185±0.0284  |
| 460 | 1.2340±0.0140 | 0.0627±0.0008 | 0.8518±0.0335  |
| 462 | 1.0981±0.0121 | 0.0669±0.0008 | 0.7958±0.0259  |
| 463 | 1.1196±0.0060 | 0.0681±0.0004 | 0.8384±0.0199  |
| 464 | 1.3184±0.0153 | 0.0486±0.0007 | 0.8050±0.0372  |
| 465 | 1.2520±0.0122 | 0.0541±0.0007 | 0.7971±0.0364  |
| 466 | 1.1489±0.0108 | 0.0561±0.0007 | 0.8144±0.0320  |
| 469 | 0.8490±0.0062 | 0.1285±0.0010 | 0.4030±0.0154  |
| 470 | 0.9143±0.0086 | 0.1570±0.0020 | 0.2950±0.0178  |
| 473 | 0.8379±0.0051 | 0.1502±0.0011 | 0.3614±0.0134  |
| 475 | 0.7912±0.0033 | 0.1215±0.0005 | 0.4174±0.0115  |
| 476 | 0.8567±0.0042 | 0.1252±0.0007 | 0.3718±0.0126  |
| 477 | 0.9231±0.0095 | 0.1177±0.0013 | 0.4670±0.0225  |
| 480 | 0.9915±0.0085 | 0.0818±0.0007 | 0.6130±0.0221  |
| 483 | 1.0157±0.0134 | 0.0536±0.0009 | 0.7423±0.0428  |
| 484 | 1.1365±0.0085 | 0.0600±0.0006 | 0.8355±0.0288  |
| 486 | 1.2098±0.0121 | 0.0620±0.0007 | 0.7956±0.0327  |
| 487 | 1.2197±0.0143 | 0.0629±0.0009 | 0.8574±0.0351  |
| 488 | 1.5333±0.0277 | 0.0671±0.0013 | 0.7901±0.0367  |
| 490 | 1.1862±0.0493 | 0.0685±0.0032 | 0.8027±0.0563  |
| 492 | 1.1623±0.0120 | 0.0614±0.0007 | 0.8353±0.0307  |
| 493 | 1.2702±0.0116 | 0.0636±0.0007 | 0.8467±0.0288  |
| 494 | 1.1435±0.0119 | 0.0631±0.0007 | 0.8268±0.0315  |
| 495 | 1.2241±0.0123 | 0.0608±0.0007 | 0.8796±0.0335  |
| 496 | 1.1606±0.0145 | 0.0566±0.0008 | 0.9142±0.0426  |
| 497 | 1.2174±0.0153 | 0.0565±0.0009 | 0.7828±0.0392  |
| 502 | 0.8446±0.0056 | 0.1233±0.0008 | 0.4996±0.0142  |
| 503 | 0.8467±0.0080 | 0.1622±0.0021 | 0.4312±0.0203  |
| 504 | 0.7636±0.0027 | 0.1775±0.0008 | 0.3406±0.0099  |
| 505 | 0.7883±0.0035 | 0.1772±0.0010 | 0.2347±0.0109  |
| 506 | 0.8227±0.0058 | 0.2681±0.0034 | 0.1202±0.0148  |
| 507 | 0.8463±0.0037 | 0.3215±0.0023 | -0.0549±0.0089 |
| 508 | 0.8865±0.0027 | 0.4169±0.0025 | -0.1680±0.0063 |

### Supplementary Table 5

S<sup>2</sup> model-free order parameters of Ca<sup>2+</sup>-bound state of CBD1

| Residue number | S <sup>2</sup> | $\tau_{\text{int}}$ (ps) | R <sub>ex</sub> (1/s) <sup>†</sup> | Exclusion criteria* |
|----------------|----------------|--------------------------|------------------------------------|---------------------|
| 373            | 0.917±0.007    | 24.028±8.060             |                                    |                     |
| 374            | 0.860±0.007    | 8.128±4.460              |                                    |                     |
| 376            | 0.942±0.006    | 0.000±7.021              |                                    |                     |
| 377            | 0.899±0.006    | 17.197±6.247             |                                    |                     |
| 378            | 0.927±0.003    | 19.246±5.054             |                                    |                     |
| 379            | 0.847±0.005    | 10.373±3.170             |                                    |                     |
| 381            | 0.853±0.004    | 7.704±3.083              |                                    |                     |
| 382            | 0.839±0.004    | 14.550±2.440             |                                    |                     |
| 383            | 0.940±0.004    | 14.603±5.900             |                                    | 1                   |
| 384            | 0.865±0.005    | 3.221±3.007              |                                    |                     |
| 385            | 0.898±0.006    | 11.239±4.869             |                                    | 1, 2                |
| 387            | 0.945±0.004    | 8.328±6.234              |                                    |                     |
| 388            | 0.955±0.006    | 6.902±7.124              |                                    |                     |
| 389            | 0.852±0.004    | 6.168±1.985              | 0.858±0.112                        | 2                   |
| 391            | 0.898±0.004    | 5.516±3.892              |                                    |                     |
| 392            | 0.857±0.005    | 10.825±3.412             |                                    |                     |
| 393            | 0.830±0.004    | 8.081±2.476              |                                    |                     |
| 394            | 0.924±0.005    | 0.000±4.078              |                                    |                     |
| 395            | 0.931±0.006    | 6.604±6.632              |                                    |                     |
| 396            | 0.894±0.005    | 9.138±4.655              |                                    |                     |
| 397            | 0.940±0.005    | 23.929±9.725             |                                    |                     |
| 399            | 0.932±0.018    | 26.976±18.300            | 10.546±0.670                       | 2, 3                |
| 402            | 0.973±0.006    | 1390.607±1166.636        |                                    | 3                   |
| 403            | 0.950±0.008    | 59.249±30.291            |                                    | 3                   |
| 404            | 0.915±0.006    | 24.773±5.400             |                                    |                     |
| 405            | 0.916±0.005    | 3.579±4.392              |                                    |                     |
| 406            | 0.908±0.006    | 15.472±5.462             |                                    | 1                   |
| 407            | 0.935±0.006    | 12.721±7.899             |                                    |                     |
| 408            | 0.966±0.005    | 0.000±8.980              |                                    | 1                   |
| 409            | 0.953±0.005    | 7.587±8.074              |                                    |                     |
| 411            | 0.948±0.006    | 38.942±11.870            |                                    |                     |
| 412            | 0.872±0.004    | 12.516±3.036             |                                    |                     |
| 413            | 0.920±0.005    | 0.000±3.406              |                                    |                     |
| 414            | 0.846±0.006    | 5.583±3.108              |                                    |                     |
| 415            | 0.872±0.006    | 3.185±3.551              |                                    |                     |
| 416            | 0.974±0.007    | 9.684±12.845             |                                    |                     |
| 417            | 0.854±0.007    | 3.213±2.749              |                                    |                     |
| 418            | 0.935±0.007    | 6.514±6.375              |                                    |                     |
| 419            | 0.879±0.005    | 0.148±2.641              |                                    |                     |
| 420            | 0.896±0.004    | 42.410±3.782             |                                    |                     |

|     |             |                |             |      |
|-----|-------------|----------------|-------------|------|
| 421 | 0.902±0.007 | 6.300±4.816    |             |      |
| 422 | 0.964±0.003 | 10.858±9.129   |             | 3    |
| 423 | 0.919±0.005 | 13.160±5.979   |             |      |
| 424 | 0.917±0.005 | 7.297±5.210    |             |      |
| 425 | 0.938±0.005 | 0.000±5.289    |             |      |
| 426 | 0.884±0.004 | 9.175±3.812    |             |      |
| 427 | 0.920±0.003 | 14.151±5.134   |             |      |
| 429 | 0.904±0.005 | 11.431±5.059   |             |      |
| 430 | 0.865±0.005 | 10.019±3.147   |             |      |
| 431 | 0.871±0.005 | 11.860±3.667   |             |      |
| 432 | 0.852±0.007 | 0.557±2.117    |             |      |
| 435 | 0.925±0.005 | 19.106±6.050   |             |      |
| 437 | 0.956±0.005 | 31.491±10.898  |             | 1    |
| 438 | 0.857±0.004 | 9.282±2.874    |             |      |
| 439 | 0.826±0.003 | 11.093±2.015   |             |      |
| 440 | 0.891±0.004 | 16.581±4.165   |             |      |
| 441 | 0.836±0.003 | 6.040±2.366    |             |      |
| 442 | 0.839±0.004 | 7.838±2.471    |             |      |
| 443 | 0.917±0.007 | 6.436±5.518    |             |      |
| 444 | 0.903±0.005 | 8.196±4.586    |             |      |
| 445 | 0.933±0.007 | 18.545±8.307   |             |      |
| 446 | 0.930±0.006 | 9.421±6.188    |             |      |
| 447 | 0.765±0.003 | 16.273±1.210   |             |      |
| 448 | 0.881±0.008 | 10.782±5.027   |             |      |
| 449 | 0.905±0.006 | 7.232±3.172    |             | 2    |
| 450 | 0.955±0.011 | 0.000±6.840    |             | 2    |
| 451 | 0.935±0.008 | 2.752±6.818    |             |      |
| 452 | 0.836±0.003 | 13.346±2.456   |             |      |
| 453 | 0.861±0.003 | 14.944±2.245   |             |      |
| 454 | 0.848±0.006 | 28.792±3.255   |             |      |
| 455 | 0.878±0.006 | 1.229±2.932    |             |      |
| 456 | 0.948±0.005 | 9.726±7.391    |             |      |
| 457 | 0.933±0.006 | 18.276±8.093   |             |      |
| 458 | 0.877±0.004 | 3.915±2.924    |             |      |
| 459 | 0.904±0.006 | 3.949±4.635    |             |      |
| 460 | 0.891±0.007 | 20.078±6.044   |             |      |
| 462 | 0.881±0.006 | 14.930±4.749   |             |      |
| 463 | 0.882±0.003 | 12.327±3.768   |             |      |
| 464 | 0.911±0.012 | 3.052±6.253    | 3.472±0.472 | 2    |
| 465 | 0.907±0.009 | 31.606±7.967   | 1.675±0.301 | 2    |
| 466 | 0.969±0.007 | 272.966±90.771 |             | 1, 3 |
| 469 | 0.729±0.003 | 76.603±2.153   |             | 4    |

|     |             |                  |         |
|-----|-------------|------------------|---------|
| 470 | 0.631±0.003 | 65.540±1.802     | 2, 4    |
| 472 | 0.701±0.002 | 77.234±1.723     | 2, 4    |
| 473 | 0.666±0.002 | 76.592±1.853     | 4       |
| 475 | 0.783±0.002 | 119.862±3.260    | 2, 3, 4 |
| 476 | 0.734±0.002 | 88.204±1.896     | 2, 4    |
| 477 | 0.751±0.004 | 73.521±2.990     | 4       |
| 480 | 0.862±0.006 | 74.233±6.257     | 4       |
| 483 | 0.873±0.020 | 1138.501±190.402 | 1, 2, 3 |
| 484 | 0.939±0.005 | 39.750±11.149    |         |
| 486 | 0.917±0.008 | 7.420±7.446      | 1       |
| 487 | 0.894±0.009 | 9.238±7.080      |         |
| 488 | 0.769±0.007 | 7.524±2.467      |         |
| 490 | 0.880±0.015 | 11.402±7.876     |         |
| 492 | 0.916±0.006 | 8.119±5.108      | 2       |
| 493 | 0.863±0.005 | 7.310±3.472      |         |
| 494 | 0.924±0.005 | 21.559±7.000     |         |
| 496 | 0.889±0.006 | 5.449±4.439      |         |
| 497 | 0.942±0.006 | 14.605±8.599     |         |
| 498 | 0.928±0.009 | 12.747±9.274     |         |
| 500 | 0.900±0.005 | 3.882±3.974      |         |
| 501 | 0.865±0.003 | 71.456±3.489     | 1, 2    |
| 502 | 0.745±0.005 | 54.064±3.295     | 1, 2    |
| 503 | 0.578±0.004 | 55.042±1.814     | 2, 4    |
| 504 | 0.623±0.001 | 48.871±0.484     | 2, 4    |
| 505 | 0.563±0.001 | 79.845±0.801     | 2, 4    |
| 506 | 0.462±0.002 | 77.478±1.044     | 2, 4    |
| 507 | 0.428±0.008 | 79.067±4.881     | 2, 4    |
| 508 | 0.373±0.001 | 77.748±0.410     | 2, 4    |

† Only non-zero values are listed.

\* Criteria used to exclude residues from the characterization of the rotational diffusion tensor. 1) RDC not consistent with the Ca<sup>2+</sup>-bound crystal structure. 2) Signs of conformational exchange. 3) High  $\tau_{\text{int}}$  value in the original fit that includes a site-specific overall correlation time. 4) Not represented in the Ca<sup>2+</sup>-bound crystal structure (see Materials and Methods).

## Supplementary Table 6

S<sup>2</sup> model-free order parameters of apo state of CBD1

| Residue number | S <sup>2</sup> | $\tau_{\text{int}}$ (ps) | R <sub>ex</sub> (1/s) <sup>†</sup> | Exclusion criteria* |
|----------------|----------------|--------------------------|------------------------------------|---------------------|
| 374            | 0.806±0.007    | 0.000±3.088              |                                    |                     |
| 376            | 0.897±0.008    | 12.334±8.288             |                                    |                     |
| 377            | 0.864±0.008    | 22.705±7.038             |                                    |                     |
| 378            | 0.899±0.005    | 6.937±6.270              |                                    |                     |
| 379            | 0.820±0.009    | 4.779±4.823              |                                    |                     |
| 380            | 0.916±0.005    | 17.553±7.659             |                                    |                     |
| 383            | 0.961±0.008    | 12.490±22.746            |                                    | 1                   |
| 384            | 0.883±0.008    | 18.407±8.527             |                                    |                     |
| 385            | 0.840±0.005    | 16.853±4.247             |                                    |                     |
| 387            | 0.950±0.006    | 4.031±11.129             |                                    |                     |
| 388            | 0.987±0.003    | 1248.741±473.763         |                                    | 3                   |
| 389            | 0.856±0.004    | 3.926±3.815              |                                    |                     |
| 391            | 0.878±0.006    | 3.394±5.004              |                                    |                     |
| 392            | 0.823±0.007    | 11.302±5.078             |                                    |                     |
| 393            | 0.809±0.006    | 5.738±3.746              |                                    |                     |
| 394            | 0.889±0.007    | 0.000±6.055              |                                    |                     |
| 395            | 0.888±0.007    | 0.000±4.589              |                                    |                     |
| 396            | 0.845±0.007    | 8.534±5.608              |                                    |                     |
| 397            | 0.901±0.006    | 24.152±8.751             |                                    |                     |
| 399            | 0.871±0.021    | 14.693±9.569             | 10.193±0.746                       | 2, 3                |
| 400            | 0.921±0.008    | 29.534±13.143            |                                    |                     |
| 403            | 0.917±0.011    | 32.083±16.029            |                                    |                     |
| 404            | 0.887±0.007    | 16.647±6.121             |                                    |                     |
| 405            | 0.869±0.007    | 17.569±6.279             |                                    |                     |
| 406            | 0.885±0.007    | 0.000±4.384              |                                    | 1                   |
| 407            | 0.876±0.006    | 5.336±5.573              |                                    |                     |
| 408            | 0.932±0.007    | 17.060±12.183            |                                    | 1                   |
| 409            | 0.920±0.006    | 4.180±7.286              |                                    |                     |
| 411            | 0.912±0.007    | 11.020±8.806             |                                    |                     |
| 412            | 0.841±0.006    | 12.081±4.369             |                                    |                     |
| 413            | 0.887±0.006    | 9.027±7.031              |                                    |                     |
| 414            | 0.819±0.008    | 8.597±5.078              |                                    |                     |
| 415            | 0.873±0.008    | 17.184±6.857             |                                    |                     |
| 416            | 0.924±0.008    | 2.227±7.690              |                                    |                     |
| 417            | 0.836±0.010    | 3.616±4.464              |                                    |                     |
| 418            | 0.913±0.015    | 16.155±11.864            | 2.497±0.417                        | 2                   |



|     |             |                 |             |      |
|-----|-------------|-----------------|-------------|------|
| 419 | 0.886±0.008 | 9.950±7.824     |             |      |
| 420 | 0.846±0.006 | 22.706±4.215    |             |      |
| 421 | 0.884±0.008 | 13.345±7.452    |             | 1    |
| 422 | 0.937±0.006 | 0.000±7.476     |             |      |
| 423 | 0.895±0.007 | 6.552±6.512     |             |      |
| 424 | 0.927±0.009 | 2.144±8.997     |             |      |
| 425 | 0.934±0.008 | 41.694±16.793   |             |      |
| 426 | 0.868±0.005 | 3.108±3.711     |             |      |
| 427 | 0.898±0.004 | 4.722±5.199     |             |      |
| 429 | 0.867±0.007 | 5.801±5.746     |             |      |
| 430 | 0.838±0.006 | 8.767±4.249     |             |      |
| 431 | 0.853±0.007 | 0.000±3.371     |             | 1    |
| 432 | 0.835±0.008 | 5.467±4.035     |             |      |
| 437 | 0.924±0.006 | 16.123±8.558    |             | 1    |
| 438 | 0.826±0.005 | 11.353±4.451    |             |      |
| 439 | 0.794±0.004 | 10.991±2.769    |             |      |
| 441 | 0.808±0.005 | 14.287±3.519    |             |      |
| 442 | 0.812±0.005 | 5.878±4.134     |             |      |
| 443 | 0.891±0.010 | 0.000±5.596     |             |      |
| 444 | 0.911±0.008 | 0.000±8.120     |             |      |
| 445 | 0.978±0.010 | 81.614±114.208  |             | 1    |
| 446 | 0.955±0.010 | 68.005±38.993   |             | 3    |
| 447 | 0.799±0.004 | 48.588±3.057    |             |      |
| 448 | 0.826±0.003 | 47.352±3.316    |             |      |
| 449 | 0.797±0.003 | 51.828±3.060    |             | 1    |
| 450 | 0.797±0.006 | 1048.263±66.216 |             | 3    |
| 451 | 0.923±0.018 | 444.444±109.028 |             | 1, 3 |
| 452 | 0.752±0.003 | 60.112±2.750    |             | 1    |
| 456 | 0.927±0.008 | 0.000±8.967     |             |      |
| 457 | 0.906±0.009 | 0.000±6.907     |             |      |
| 458 | 0.841±0.006 | 10.078±4.404    |             |      |
| 459 | 0.889±0.008 | 13.454±7.785    |             | 1    |
| 460 | 0.851±0.008 | 1.634±5.228     |             |      |
| 462 | 0.861±0.008 | 18.813±6.209    |             |      |
| 463 | 0.849±0.004 | 7.628±3.921     |             |      |
| 464 | 0.931±0.010 | 23.223±15.068   |             |      |
| 465 | 0.879±0.011 | 17.766±8.705    | 1.117±0.333 | 2    |
| 466 | 0.931±0.008 | 24.445±15.758   |             |      |
| 469 | 0.685±0.004 | 76.462±3.495    |             | 4    |
| 470 | 0.587±0.005 | 65.167±2.458    |             | 2, 4 |
| 473 | 0.635±0.003 | 71.823±2.385    |             | 4    |
| 475 | 0.730±0.003 | 99.203±3.154    |             | 4    |

|     |             |                 |             |      |
|-----|-------------|-----------------|-------------|------|
| 476 | 0.686±0.003 | 83.006±2.707    |             | 4    |
| 477 | 0.693±0.006 | 59.771±3.873    |             | 4    |
| 480 | 0.818±0.006 | 59.467±5.878    |             | 4    |
| 483 | 0.928±0.016 | 664.624±246.570 | 0.831±0.426 | 2, 3 |
| 484 | 0.905±0.006 | 11.204±9.042    |             |      |
| 486 | 0.871±0.007 | 17.595±7.519    |             | 1    |
| 487 | 0.856±0.009 | 1.643±4.963     |             |      |
| 488 | 0.731±0.010 | 6.649±3.738     |             |      |
| 490 | 0.822±0.028 | 12.112±10.076   |             |      |
| 492 | 0.884±0.008 | 7.934±7.211     |             |      |
| 493 | 0.831±0.006 | 2.002±3.561     |             |      |
| 494 | 0.877±0.008 | 10.704±7.956    |             |      |
| 495 | 0.872±0.007 | 0.000±4.606     |             |      |
| 496 | 0.921±0.009 | 0.000±12.846    |             |      |
| 497 | 0.899±0.010 | 26.679±11.183   |             |      |
| 502 | 0.713±0.004 | 64.330±2.911    |             | 1    |
| 503 | 0.617±0.005 | 55.752±2.909    |             | 2, 4 |
| 504 | 0.612±0.002 | 77.995±1.771    |             | 4    |
| 505 | 0.590±0.003 | 89.396±1.963    |             | 4    |
| 506 | 0.465±0.004 | 73.725±1.866    |             | 2, 4 |
| 507 | 0.405±0.003 | 81.657±1.396    |             | 2, 4 |
| 508 | 0.344±0.001 | 78.274±0.705    |             | 2, 4 |

† Only non-zero values are listed.

\* Criteria used to exclude residues from the characterization of the rotational diffusion tensor. 1) RDC not consistent with the Ca<sup>2+</sup>-bound crystal structure. 2) Signs of conformational exchange. 3) High  $\tau_{\text{int}}$  value in the original fit that includes a site-specific overall correlation time. 4) Not represented in the Ca<sup>2+</sup>-bound crystal structure (see Materials and Methods).
